# Supplementary material for: A Light‐Triggered Mesenchymal Stem Cell Delivery System for Photoacoustic Imaging and Chemo‐Photothermal Therapy of Triple Negative Breast Cancer
Source: PubMed Central journal article supplement (PMC6193170; doi:10.1002/advs.201800382), 2018-08-24
Supplement: ADVS-5-1800382-s001.pdf [file ADVS-5-1800382-s001.pdf]

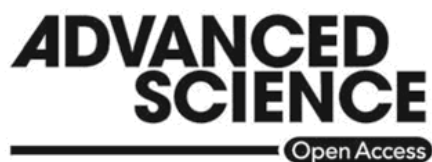

## Supporting Information

for *Adv. Sci.*, DOI: 10.1002/adv.201800382

A Light-Triggered Mesenchymal Stem Cell Delivery System  
for Photoacoustic Imaging and Chemo-Photothermal Therapy  
of Triple Negative Breast Cancer

*Chang Xu, Qishuai Feng, Haocheng Yang, Guangxue Wang,  
Liqun Huang, Qianwen Bai, Chuyi Zhang, Yilong Wang,\*  
Yingna Chen, Qian Cheng, Mengwei Chen, Yu Han, Zuoren  
Yu,\* Maciej S. Lesniak, and Yu Cheng\**

## Supporting Information

**A Light-Triggered Mesenchymal Stem Cell Delivery System for Photoacoustic Imaging and Chemo-Photothermal Therapy of Triple Negative Breast Cancer**

*Chang Xu<sup>a</sup>, Qishuai Feng<sup>a</sup>, Haocheng Yang<sup>a</sup>, Guangxue Wang<sup>b</sup>, Liqun Huang<sup>c</sup>, Qianwen Bai<sup>a</sup>, Chuyi Zhang<sup>b</sup>, Yilong Wang<sup>a\*</sup>, Yingna Chen<sup>d</sup>, Qian Cheng<sup>d</sup>, Mengwei Chen<sup>a</sup>, Yu Han<sup>e</sup>, Zuoren Yu<sup>b\*</sup>, Maciej S. Lesniak<sup>e</sup>, Yu Cheng<sup>a\*</sup>*

<sup>a</sup> The Institute for Translational Nanomedicine, Shanghai East Hospital; The Institute for Biomedical Engineering & Nano Science, Tongji University School of Medicine, 150 Jimo Road, Shanghai, 200120, China.

<sup>b</sup> Research Center for Translational Medicine, Key Laboratory of Arrhythmias of the Ministry of Education of China, East Hospital, Tongji University School of Medicine, 150 Jimo Road, Shanghai 200120, China.

<sup>c</sup> Department of Urology, Shanghai East Hospital, Tongji University School of Medicine, Shanghai, 200120, China.

<sup>d</sup> Institute of Acoustics, Tongji University, Siping Road 1239, Shanghai 200092, China.

<sup>e</sup> Department of Neurological Surgery, The Feinberg School of Medicine, Northwestern University, Chicago, IL 60611, USA.

Corresponding authors: yilongwang@tongji.edu.cn; zuoren.yu@tongji.edu.cn;

yucheng@tongji.edu.cn

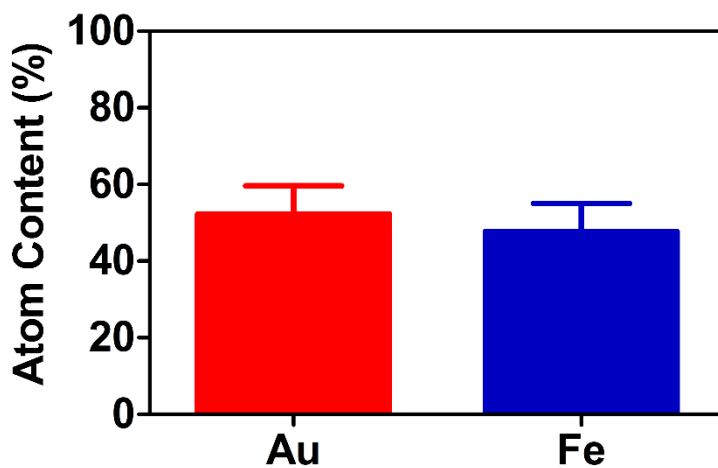

Figure S1. Au and Fe atom contents in LDGI.

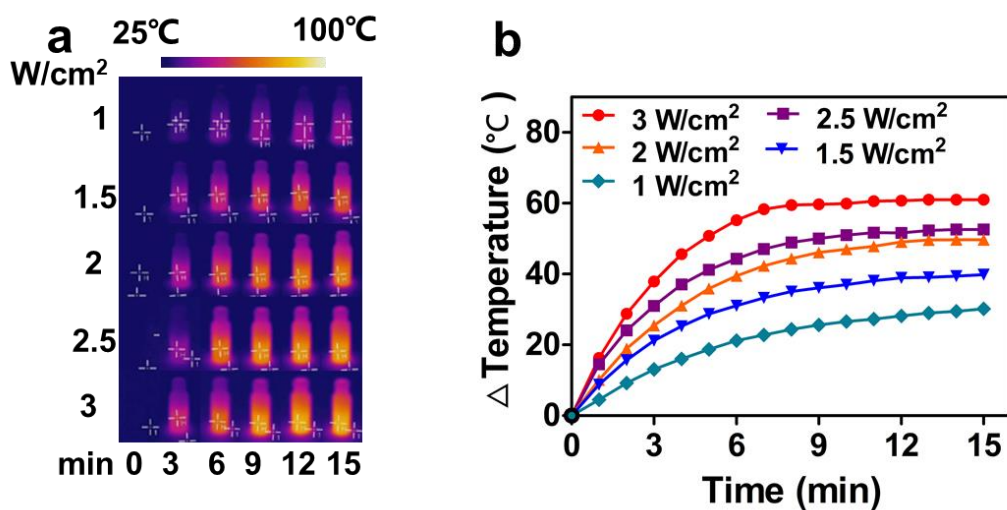

Figure S2. Photothermal analysis with different laser power. (a) Photothermal effect of 120 µg/mL LDGI with different laser irradiation power (1 W/cm<sup>2</sup>, 1.5 W/cm<sup>2</sup>, 2 W/cm<sup>2</sup>, 2.5 W/cm<sup>2</sup>, 3 W/cm<sup>2</sup>) and corresponding temperature changing curves (b) under 808 nm laser at 3 W/cm<sup>2</sup> for 15 min.

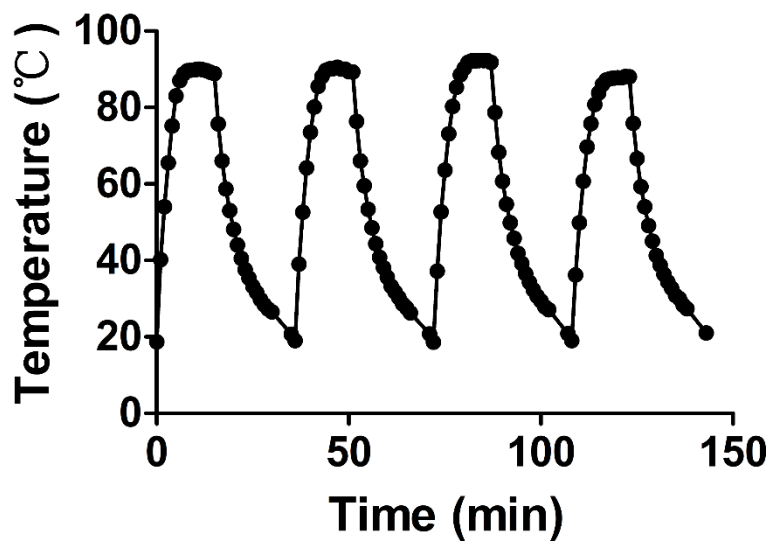

Figure S3. Photothermal ability of LDGI for four circles.

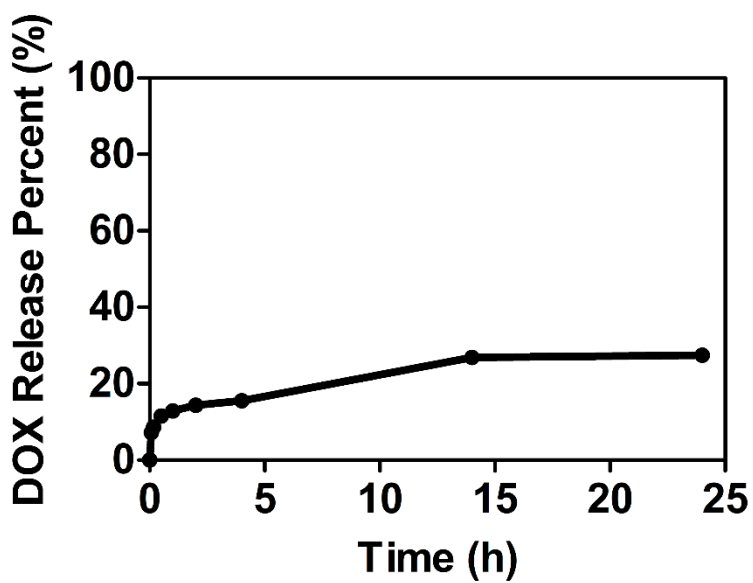

Figure S4. Cumulative DOX release curve within 24 h after synthesis of LDGI.

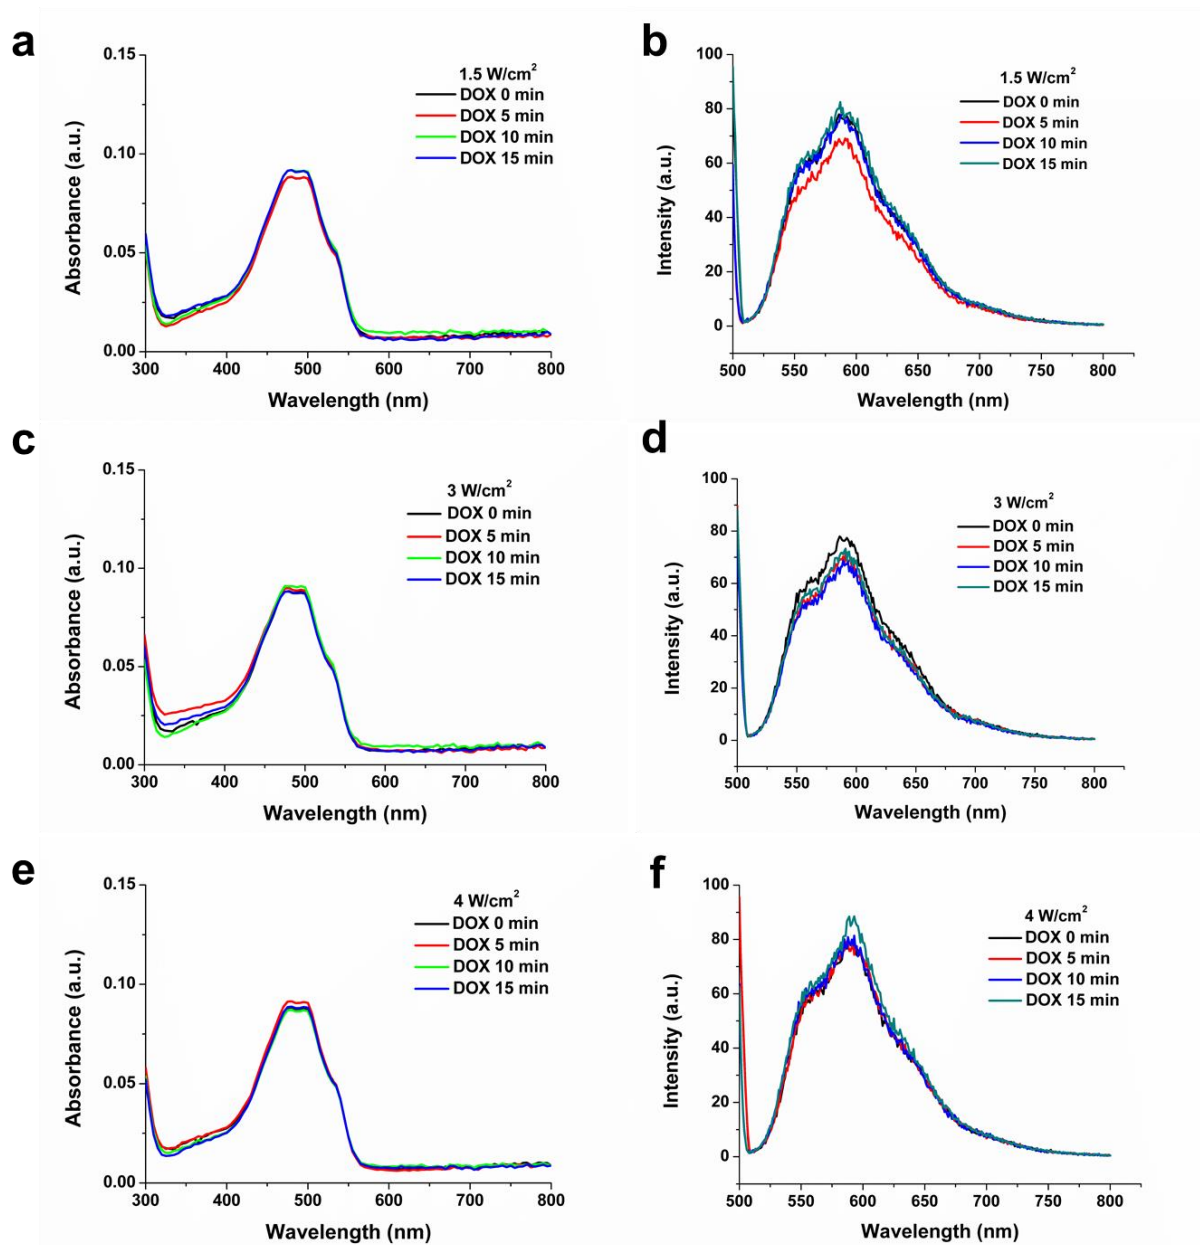

**Figure S5.** Time-dependent (5 min, 10 min and 15 min) influence of DOX under 808 nm laser irradiation in different powers. (a) DOX absorbance in UV-vis-NIR and (b) fluorescence spectra with laser irradiation of 1.5 W/cm<sup>2</sup>, (c) DOX absorbance in UV-vis-NIR and (d) fluorescence spectra with laser irradiation of 3 W/cm<sup>2</sup> and (e) DOX absorbance in UV-vis-NIR and (f) fluorescence spectra with laser irradiation of 4 W/cm<sup>2</sup>. (The initial concentrations of DOX was 10  $\mu$ M.)

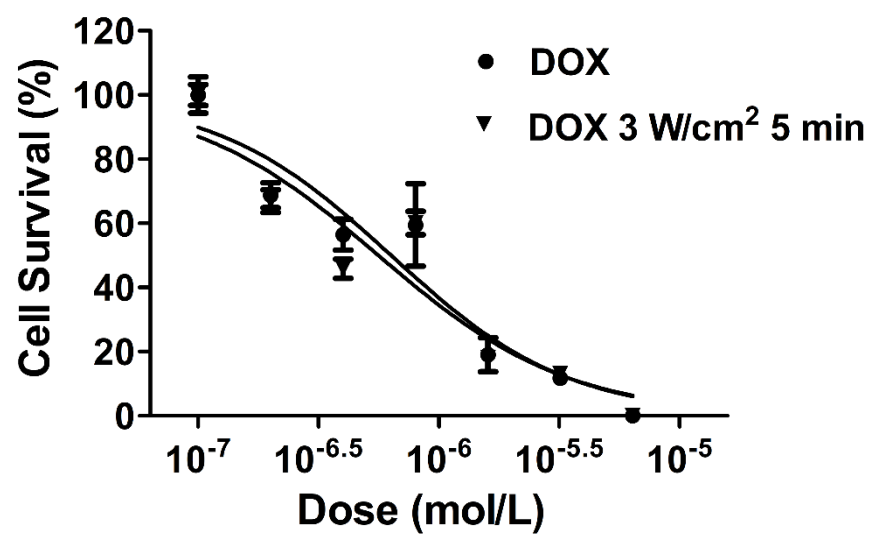

**Figure S6.** IC50 curve of MDA-MB-231 cells treated with DOX exposed to laser (3 W/cm<sup>2</sup>, 5 min).

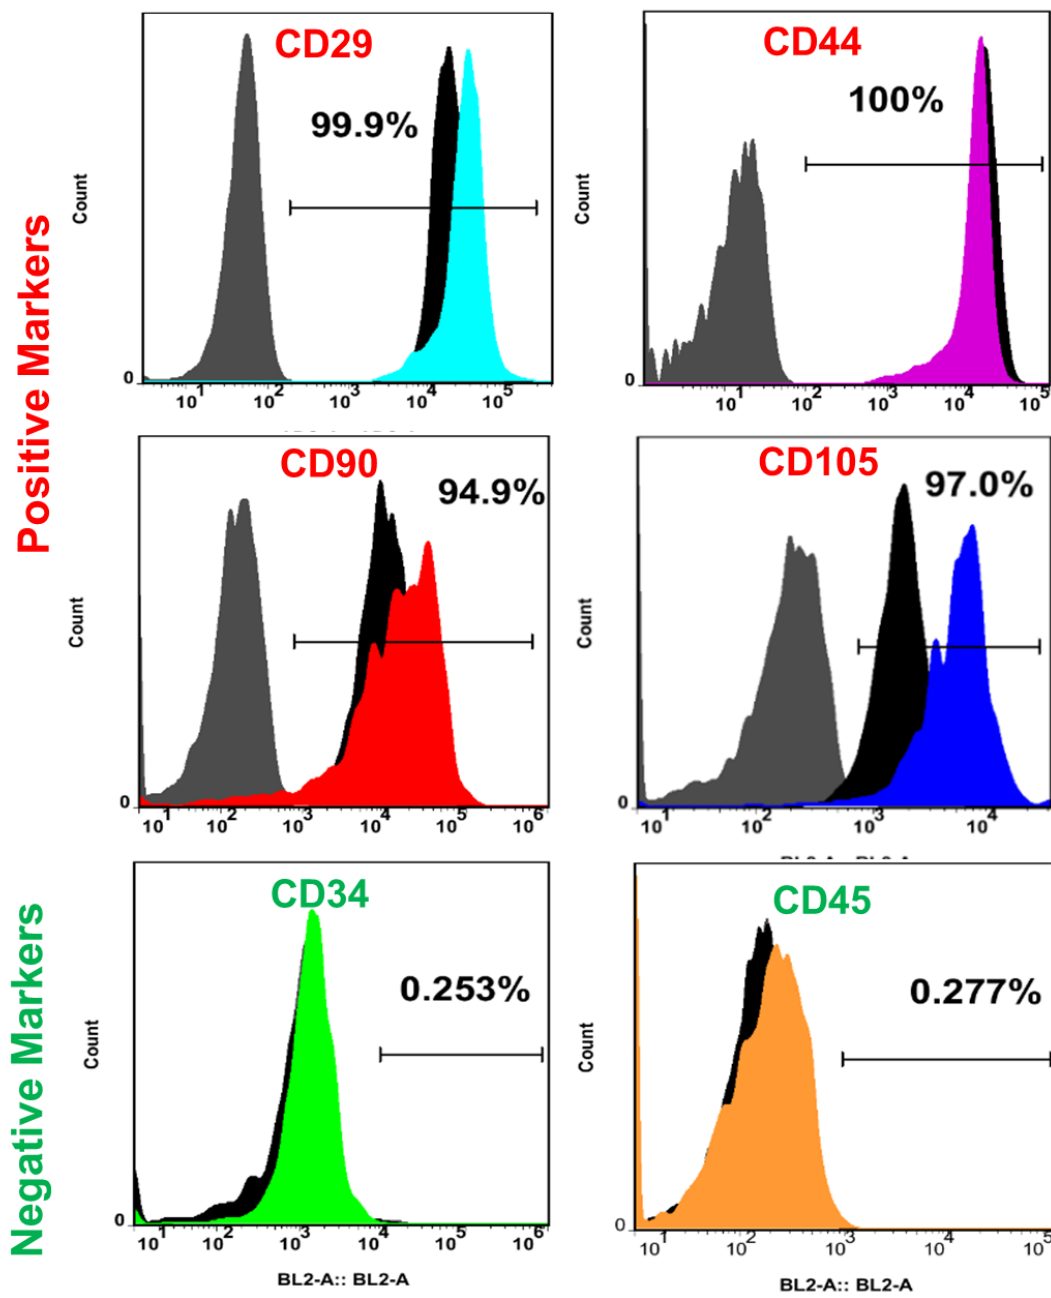

**Figure S7.** Specific surface markers of stem cells expression on MSCs treated with LDGI after 72 h tested by Flow cytometry.

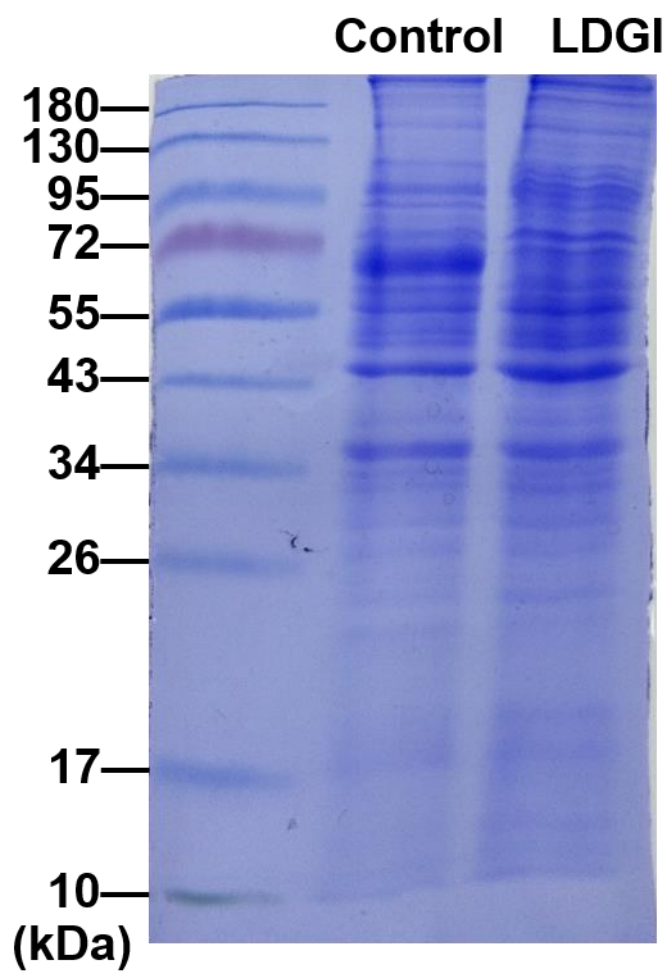

**Figure S8.** SDS-PAGE protein analysis. Samples were stained with Coomassie brilliant blue kit. MSCs-LDGI supernatant extracellular vesicles were collected 24 h after incubation, and MSCs supernatant extracellular vesicles were collected as control.



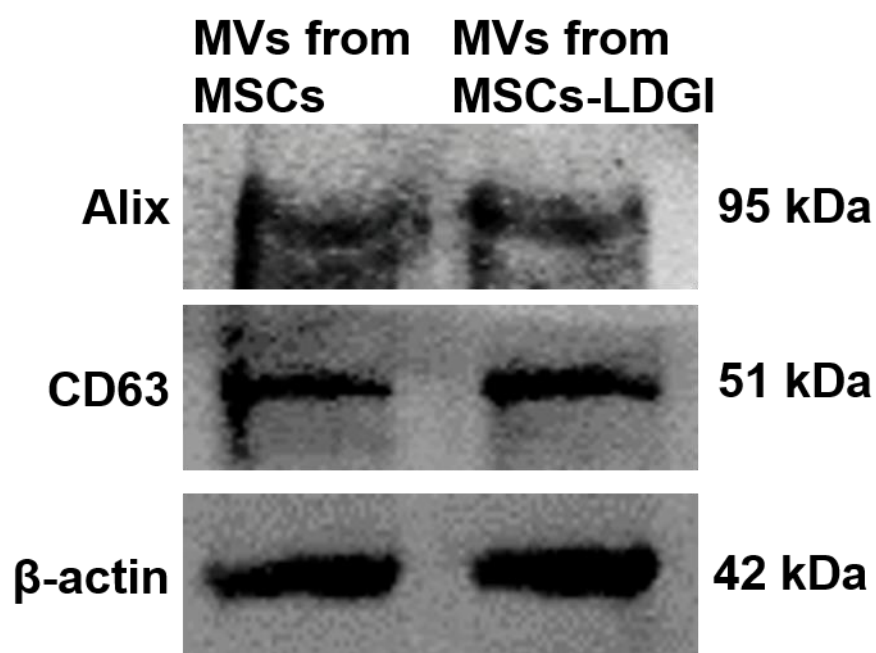

**Figure S9.** Cell exosome protein expression on MVs from MSCs and MSCs-LDGI, respectively.

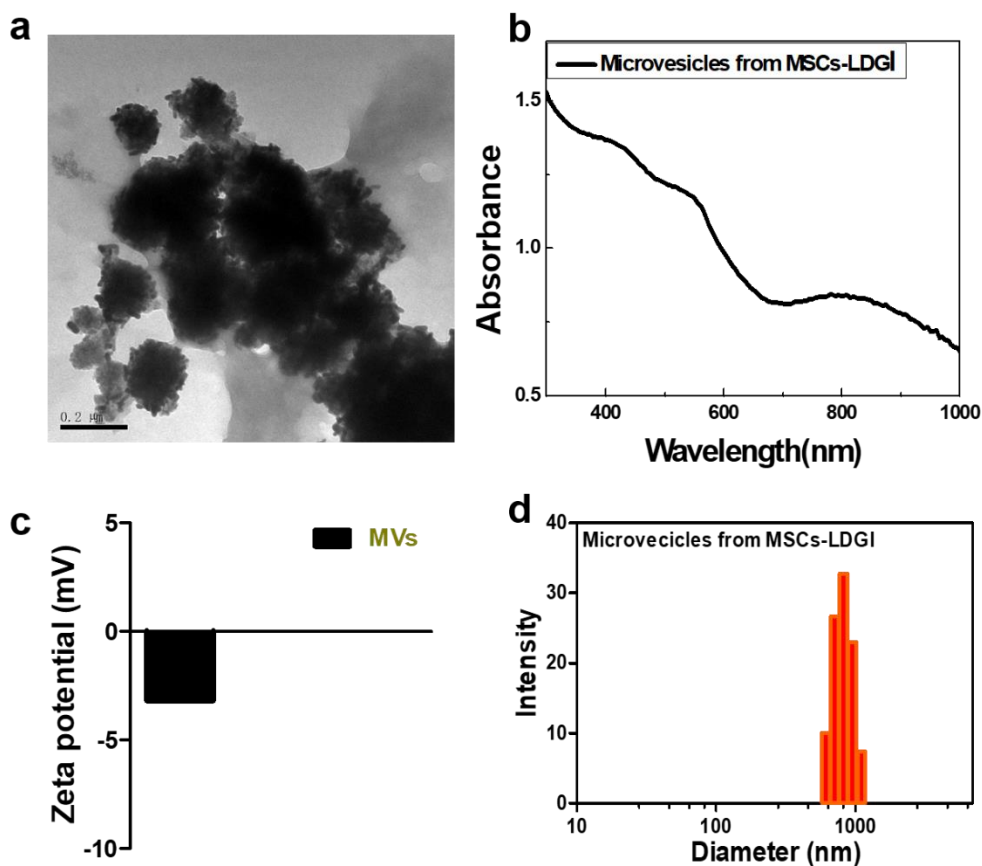

**Figure S10.** Characterization of microvesicles from MSCs-LDGI. (a) Representative TEM image of microvesicles from MSCs-LDGI. (b) UV-vis-NIR spectra of microvesicles from MSCs-LDGI. (c) Zeta potential of microvesicles from MSCs-LDGI in PBS. (e) Size distribution of microvesicles from MSCs-LDGI in PBS.

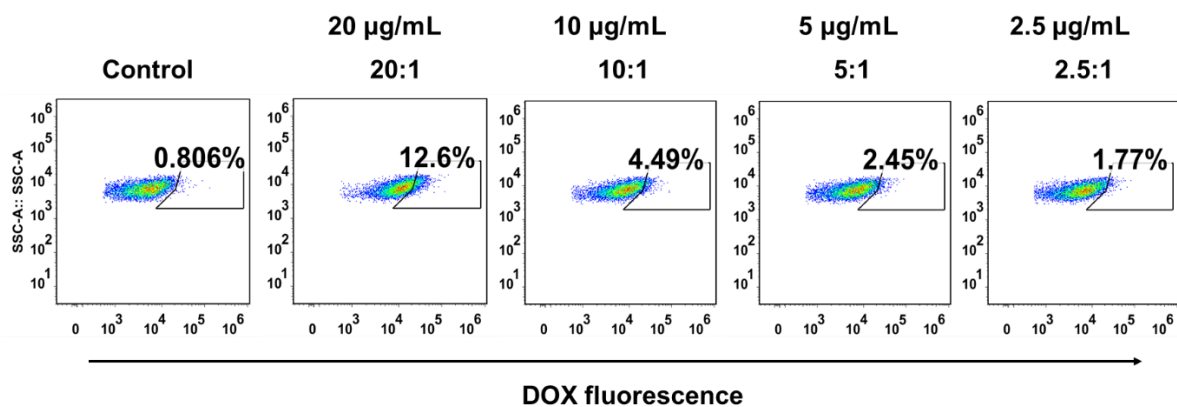

**Figure S11.** DOX fluorescence of MDA-MB-231 cells treated with MVs from MSCs-LDGI with different concentrations (20:1, 10:1, 5:1, 2.5:1).

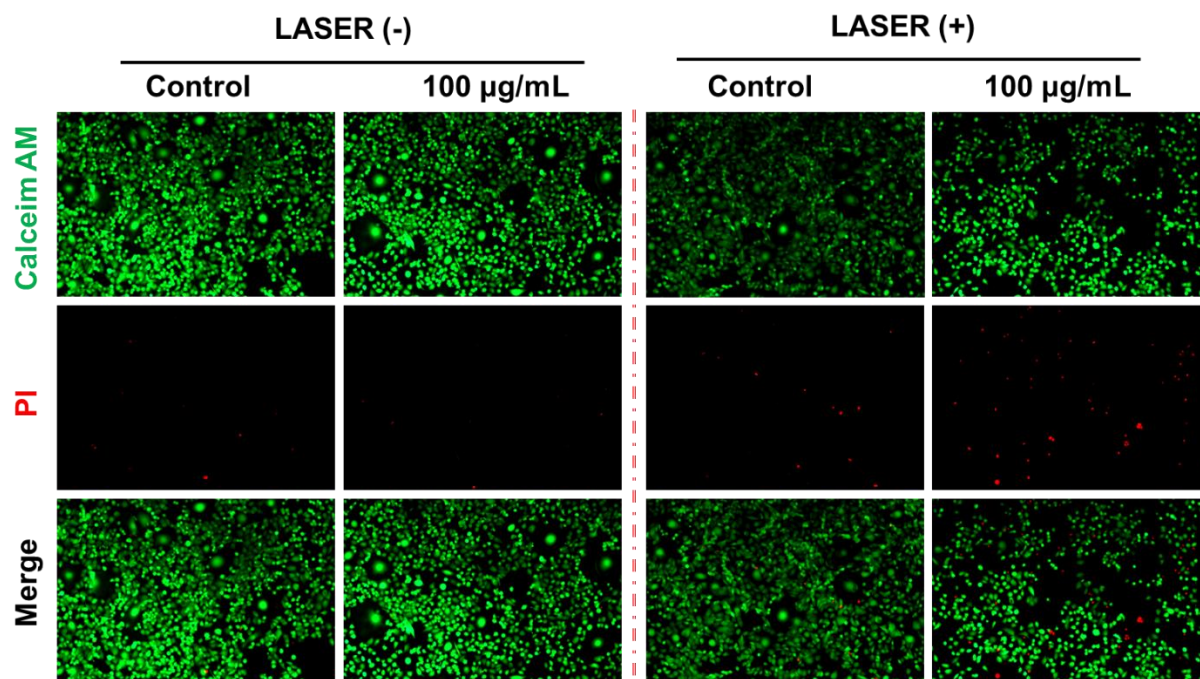

**Figure S12.** LIVE/DEAD cell viability tests of MDA-MB-231 cells treated with MVs from MSCs-LDGI with and without laser irradiation ( $3 \text{ W/cm}^2$ ).

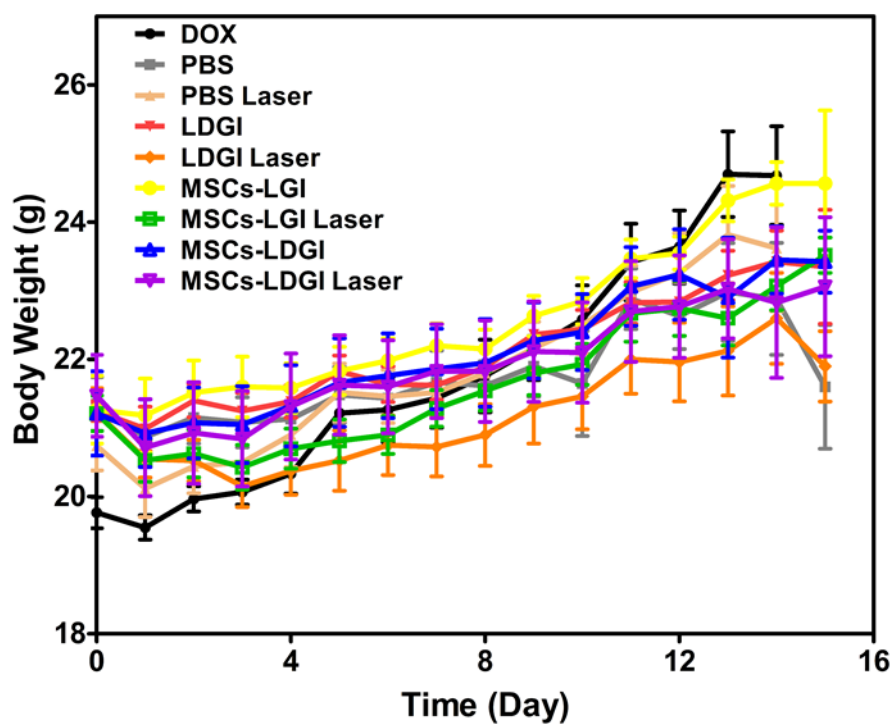

**Figure S13.** Body weight curves of mice intratumorally injected with DOX, PBS, LDGI, MSCs-LDI, MSCs-LDGI with and without NIR laser.

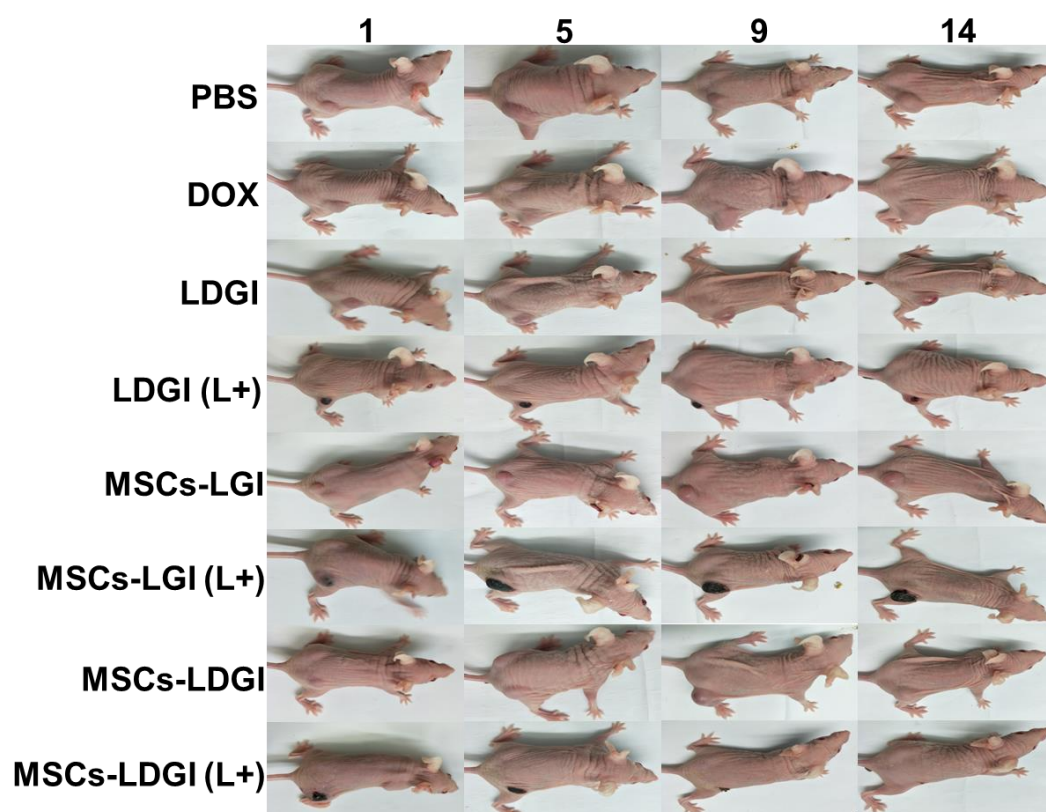

**Figure S14.** Images of mice of intravenous injected with DOX, PBS, LDGI, MSCs-LDI, MSCs-LDGI with and without NIR laser irradiation within 15 days.
